# Supplementary material
Source: Royal Society of Chemistry journal article supplement (doi:10.1039/d5nr04197j)
Supplement: d5nr04197j5.pdf [file d5nr04197j5.pdf]

## Highly Selective Room-Temperature Ammonia Gas Sensor Based on Sheet-like Ni<sub>x</sub>C/ZnO Heterojunction

*Hongmin Zhu<sup>a, b</sup>, Ying Li<sup>a, b</sup>, Mingjie Dai<sup>a</sup>, Bicheng Cai<sup>a, b</sup>, Ru Wang<sup>a</sup>, Yutong Guo<sup>a</sup>,  
Yanbai Shen<sup>c</sup>, Tianyao Qi<sup>a, \*</sup>, Fanli Meng<sup>a, b, \*</sup>, Yong Zhao<sup>a, b, \*</sup>*

- a. College of Information Science and Engineering, Northeastern University, Shenyang 110819, China.
- b. Hebei Key Laboratory of Micro-Nano Precision Optical Sensing and Measurement Technology, Qinhuangdao, 066004, China.
- c. Resources and Civil Engineering, Northeastern University, Shenyang 110819, China.

\*Corresponding authors: Tianyao Qi (qitianyao2025@126.com), Fanli Meng (mengfanli@ise.neu.edu.cn), Yong Zhao (zhaoyong@ise.neu.edu.cn).

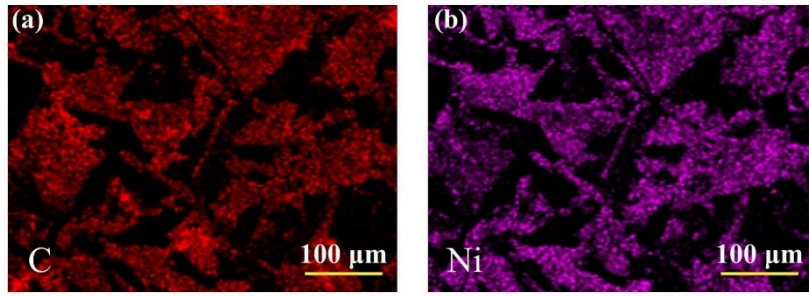

Figure. S1. Elemental mappings images of S0 sensor.

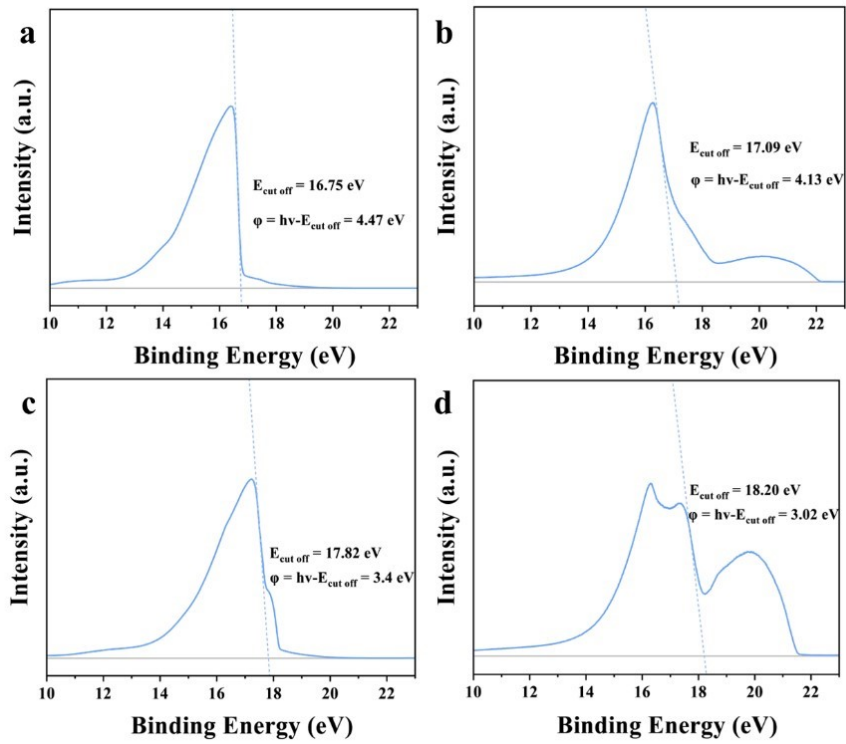

Figure. S2. UPS spectra of (a) S3 sensor, (b) S0 sensor, (c) S1 sensor and (d) S2 sensor.

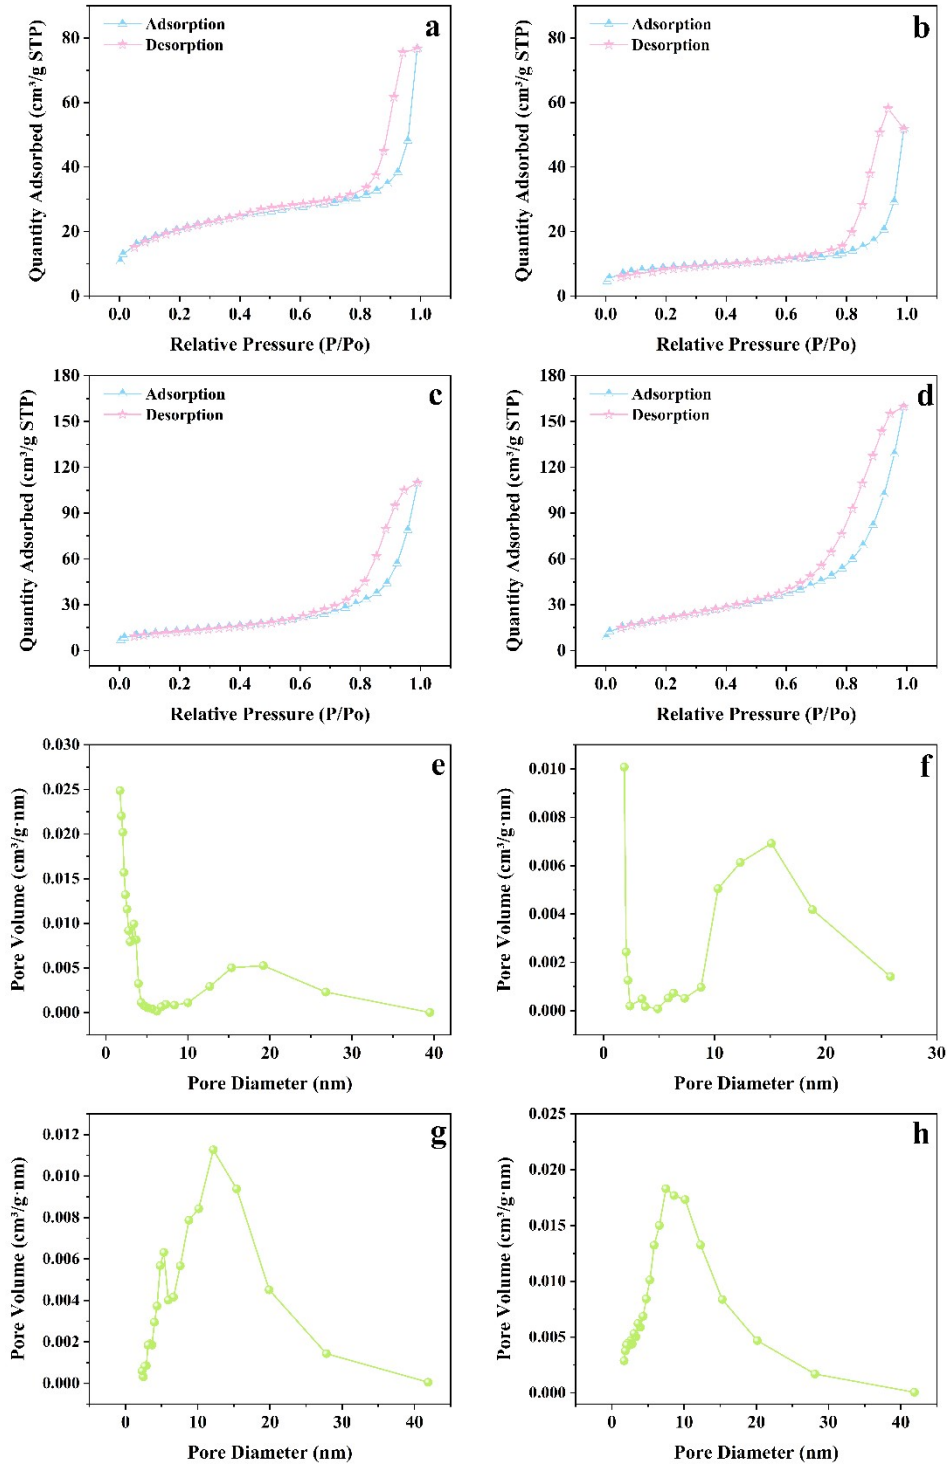

Figure. S3. N<sub>2</sub> adsorption-desorption isotherms of (a) S3 sensor, (b) S0 sensor, (c) S1 sensor, (d) S2 sensor, and BJH pore size distribution curves of (e) S3 sensor, (f) S0 sensor, (g) S1 sensor, (h) S2 sensor.

Table S1. BET surface area, total pore volume and desorption average pore of S0-S3 sensors.

| <b>Sensor</b> | <b>BET Surface Area<br/>(m<sup>2</sup>/g)</b> | <b>Total pore volume<br/>(cm<sup>3</sup>/g)</b> | <b>Desorption average<br/>pore diameter (nm)</b> |
|---------------|-----------------------------------------------|-------------------------------------------------|--------------------------------------------------|
| S0            | 29.39                                         | 0.08                                            | 12.61                                            |
| S1            | 44.78                                         | 0.16                                            | 12.15                                            |
| S2            | 77.12                                         | 0.24                                            | 9.50                                             |
| S3            | 71.73                                         | 0.11                                            | 6.83                                             |
