# Supplementary material
Source: Royal Society of Chemistry journal article supplement (doi:10.1039/d5nr04197j)

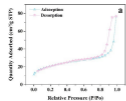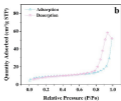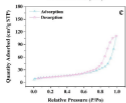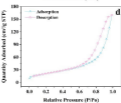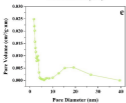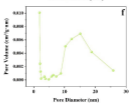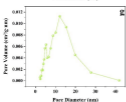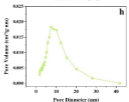

Supplement: d5nr04197j2.pdf [file d5nr04197j2.pdf]

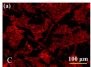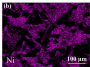

Supplement: d5nr04197j3.pdf [file d5nr04197j3.pdf]

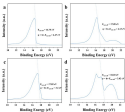

Supplement: d5nr04197j4.pdf [file d5nr04197j4.pdf]
